# Supplementary figures and images for: Curcumin Mitigates AFB1-Induced Hepatic Toxicity by Triggering Cattle Antioxidant and Anti-inflammatory Pathways: A Whole Transcriptomic In Vitro Study
Source: MDPI journal article supplement (doi:10.3390/antiox9111059), 2020-10-29

CYP1A1

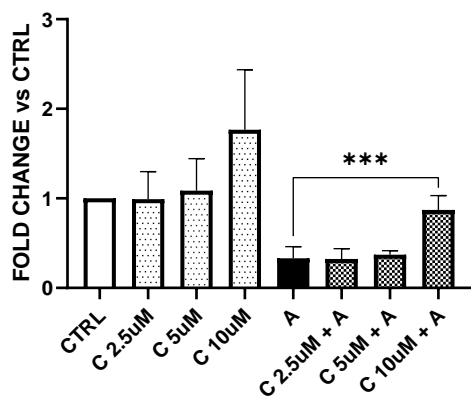

CYP1B1

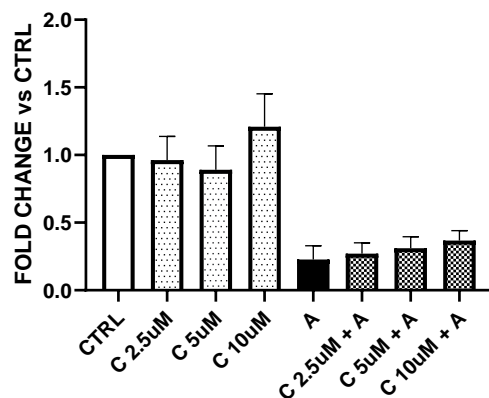

CYP3A28

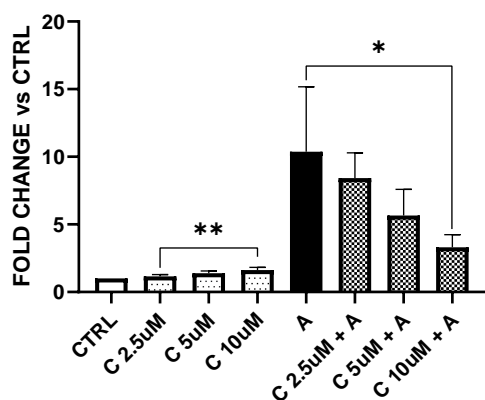

NQO1

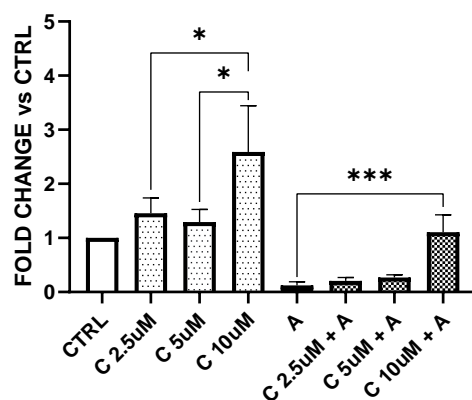

AHR

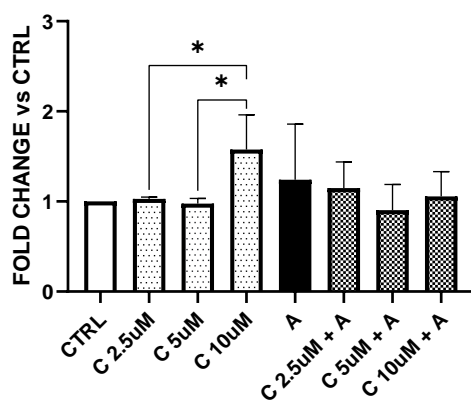

ARNT

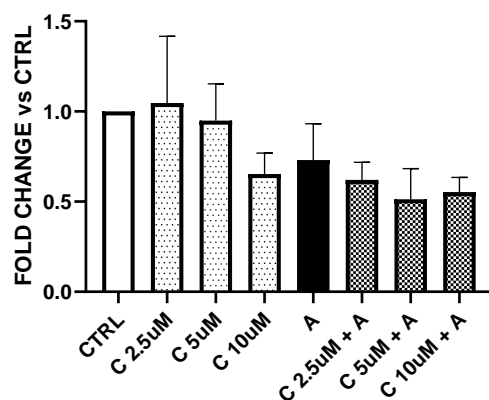

NRF2

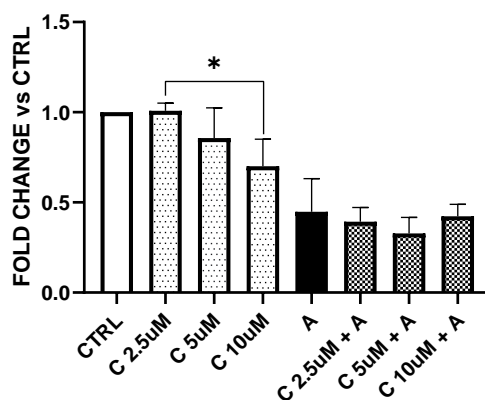

KEAP1

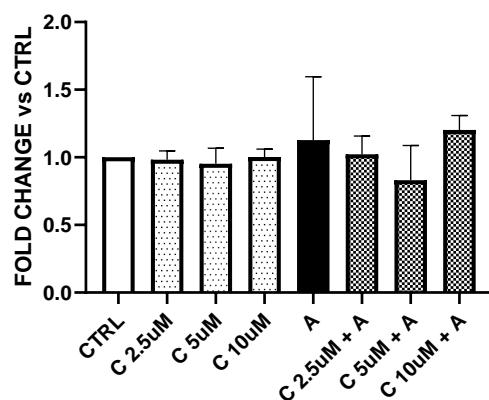

CAT

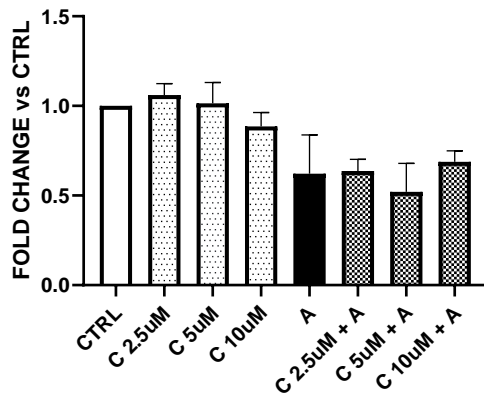

GPX1

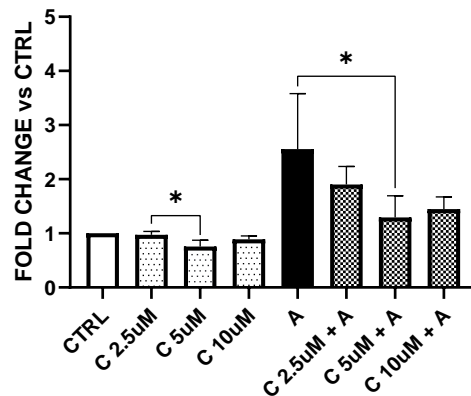

SOD1

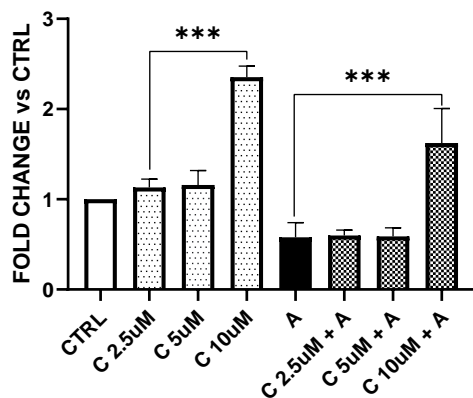

SOD2

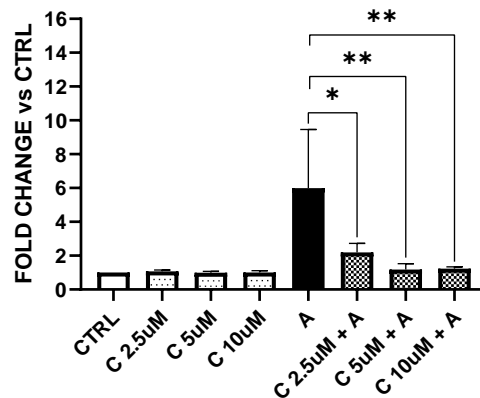

Supplement: s1 [file s1]

CYP1A1

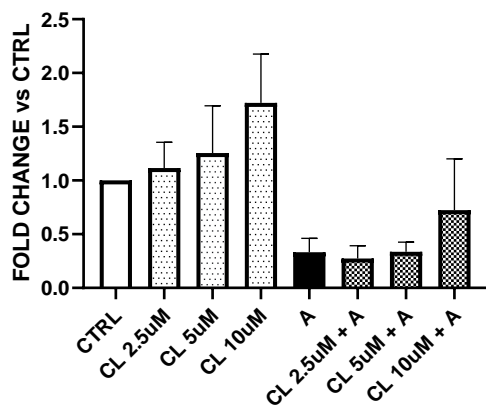

CYP1B1

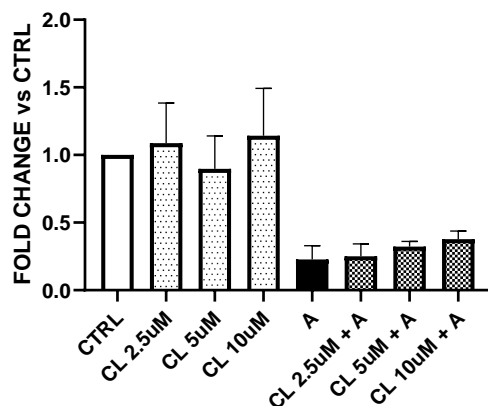

CYP3A28

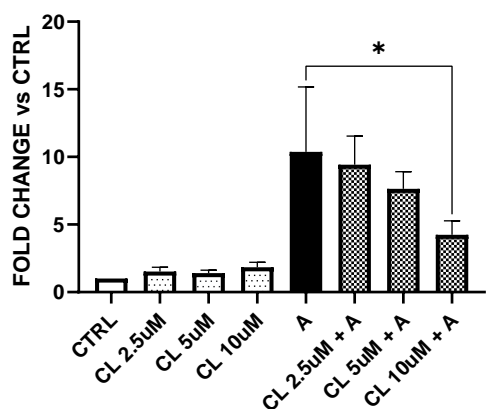

NQO1

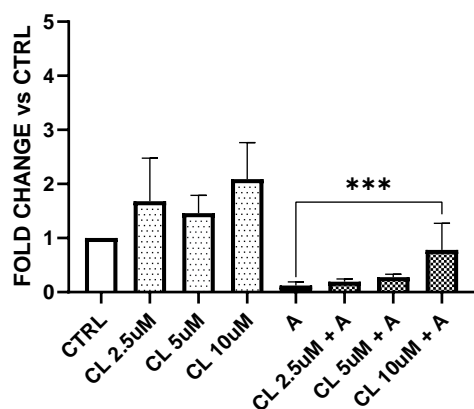

AHR

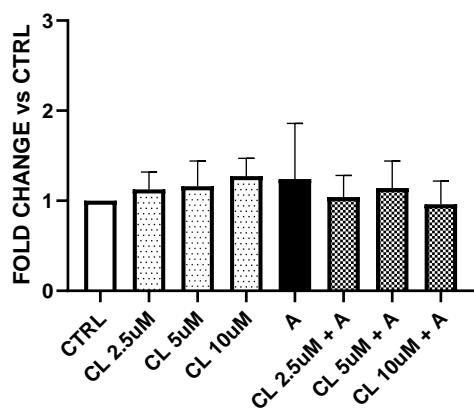

ARNT

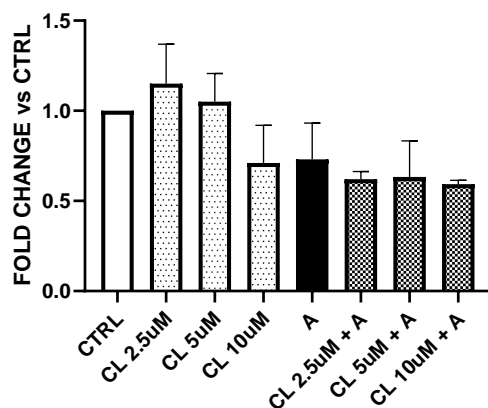

NRF2

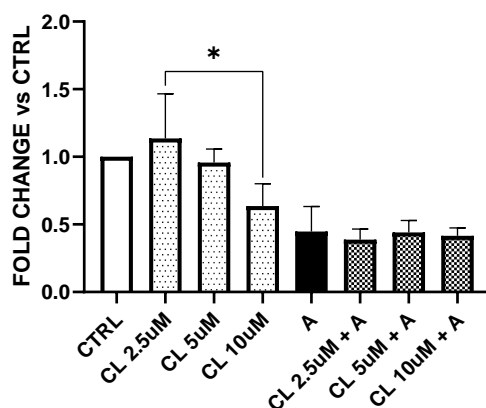

KEAP1

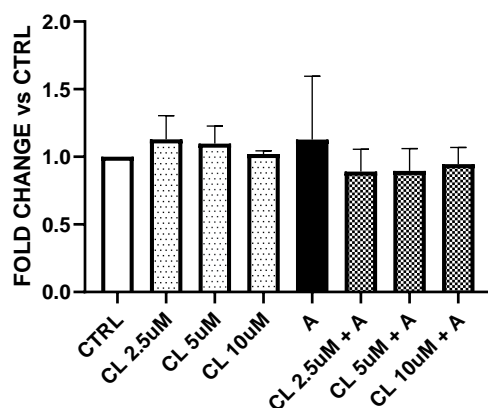

CAT

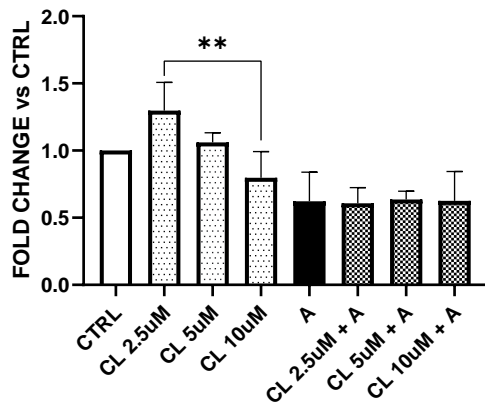

GPX1

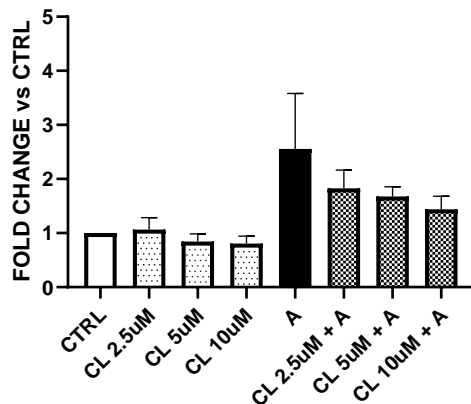

SOD1

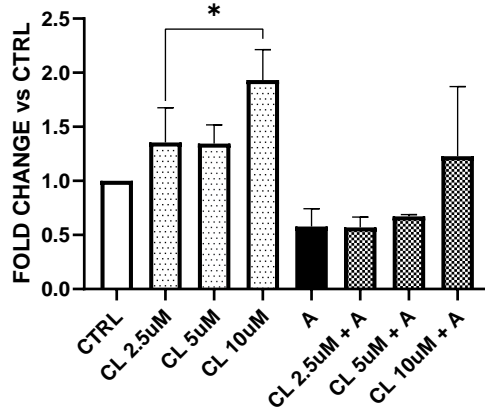

SOD2

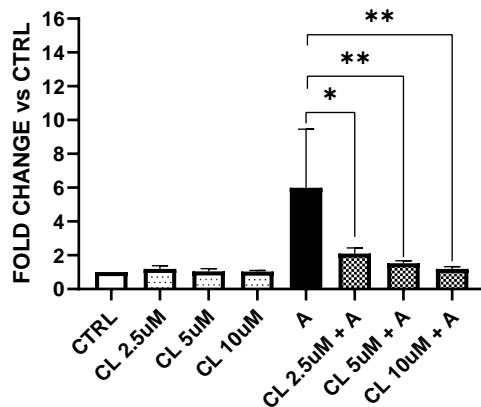

Supplement: s1 [file s1]
